# Supplementary material
Source: HighWire-hosted journal article supplement (http://www.cmaj.ca/highwire/filestream/59168/field_highwire_adjunct_files/1/birth-urquia-2-at.pdf)
Supplement: birth-urquia-2-at.pdf [file birth-urquia-2-at.pdf]

**Appendix 2 (as supplied by the authors): Definitions of the outcome measures and codes used within the administrative health databases**

| <b>Outcome</b>                                | <b>Method used to identify the outcome, including use of International Statistical Classification of Diseases and Related Health Problems, 10th Revision, Canadian Edition (ICD-10-CA) codes, Canadian Classification of Health Interventions (CCI) codes and/or Canadian Institute for Health Information (CIHI) diagnostic codes</b> |
|-----------------------------------------------|----------------------------------------------------------------------------------------------------------------------------------------------------------------------------------------------------------------------------------------------------------------------------------------------------------------------------------------|
| <b>Infant</b>                                 |                                                                                                                                                                                                                                                                                                                                        |
| Neonatal death                                | Death < 28 days after birth                                                                                                                                                                                                                                                                                                            |
| Prolonged newborn hospital stay               | Length of stay (LOS) in the index birth hospitalization $\geq 7$ days, excluding readmissions                                                                                                                                                                                                                                          |
| Neonatal admission to the intensive care unit | Special CIHI variable: special care unit (SCU = 50) from April 1, 2002 to March 31, 2008<br>Special Care Unit (SCU = 50–53) from April 1, 2008 to March 31, 2012                                                                                                                                                                       |
| Assisted mechanical ventilation               | CCI codes: 1GZ31CAEP, 1GZ31CAND, 1GZ31CAPK, 1GZ31CRND, 1GZ31GPND, 1GZ31JAGX, 1GZ31JAMD, 1GZ31JANC, 1GZ31JAPK                                                                                                                                                                                                                           |
| Intrauterine hypoxia or birth asphyxia        | ICD-10-CA codes: P20, P21                                                                                                                                                                                                                                                                                                              |
| Birth trauma                                  | ICD-10-CA codes: P10-P15                                                                                                                                                                                                                                                                                                               |
| <b>Obstetric</b>                              |                                                                                                                                                                                                                                                                                                                                        |
| Third- or fourth-degree perineal laceration   | ICD-10-CA codes: O702, O703                                                                                                                                                                                                                                                                                                            |
| Obstructed labour due to shoulder dystocia    | ICD-10-CA code: O660                                                                                                                                                                                                                                                                                                                   |
| Postpartum hemorrhage                         | ICD-10-CA codes: O720, O721, O722                                                                                                                                                                                                                                                                                                      |
